# Supplementary material for: Replication of HLA class II locus association with susceptibility to podoconiosis in three Ethiopian ethnic groups
Source: PubMed Central journal article supplement (PMC7870958; doi:10.1038/s41598-021-81836-x), 2021-02-08
Supplement: 41598_2021_81836_MOESM1_ESM.pdf [file 41598_2021_81836_MOESM1_ESM.pdf]

## Supplementary information

### Replication of HLA class II locus association with susceptibility to podoconiosis in three Ethiopian ethnic groups

Tewodros Gebresilase<sup>1,2</sup>, Chris Finan<sup>3</sup>, Daniel Suveges<sup>4</sup>, Tesfaye Sisay Tessema<sup>2</sup>, Abraham Aseffa<sup>1</sup>, Gail Davey<sup>5</sup>, Konstantinos Hatzikotoulas<sup>4</sup>, Eleftheria Zeggini<sup>4</sup>, Melanie J. Newport<sup>5</sup>, Fasil Tekola-Ayele<sup>6</sup>

#### Affiliations

1. *Armauer Hansen Research Institute (AHRI), Addis Ababa, Ethiopia*
2. *Unit of Health Biotechnology, Institute of Biotechnology, College of Natural and Computational Sciences, Addis Ababa University, Ethiopia*
3. *Institute of Cardiovascular Science, Faculty of Population Health, University College London, London, U.K*
4. *Wellcome Trust Sanger Institute, Hinxton, Cambridge, UK*
5. *Brighton and Sussex Centre for Global Health Research, Brighton and Sussex Medical School, Brighton, UK*
6. *Epidemiology Branch, Division of Intramural Population Health Research, Eunice Kennedy Shriver National Institute of Child Health and Human Development, National Institutes of Health, Bethesda, MD, USA*

## Supplementary tables

Supplementary Table 1: Participant characteristics for subjects included in final data analysis

| Characteristics           | Category       | Newly recruited study participants (Dataset 1, n=1892) |                  | Previous Wolaita study cohort (n=397) |                  | Dataset 1 and previous Wolaita cohorts combined (Dataset 3; n= 2289) |                 |
|---------------------------|----------------|--------------------------------------------------------|------------------|---------------------------------------|------------------|----------------------------------------------------------------------|-----------------|
|                           |                | Cases (N=943)                                          | Controls (N=949) | Cases (N=194)                         | Controls (N=203) | Cases (N=1137)                                                       | Controls (1152) |
| Gender                    | Male no (%)    | 433 (45.9)                                             | 535 (56.4)       | 93 (47.9)                             | 87 (42.9)        | 526 (46.3)                                                           | 622 (54)        |
|                           | Female no (%)  | 510 (54.1)                                             | 414 (43.6)       | 101 (52.1)                            | 116 (57.1)       | 611 (53.7)                                                           | 530 (46)        |
| Age                       | Mean (SD)      | 47.2 (14.2)                                            | 59.3 (8.2)       | 24 (6.8)                              | 62.3 (10.8)      | 47.4 (14.5)                                                          | 59.7 (8.2)      |
|                           | Median (range) | 48 (18 - 95)                                           | 57 (50 - 99)     | 22 (18-50)                            | 60 (50-102)      | 48 (18 - 90)                                                         | 58 (50 - 95)    |
| Ethnicity                 | Amhara         | 379 (40.2)                                             | 373 (39.3)       |                                       |                  | 379 (32.6)                                                           | 373 (32.3)      |
|                           | Oromo          | 371 (39.3)                                             | 388 (40.9)       |                                       |                  | 371 (33.3)                                                           | 388 (33.7)      |
|                           | Wolaita        | 191 (20.3)                                             | 185 (19.5)       | 190                                   | 203              | 381 (33.5)                                                           | 388 (33.7)      |
|                           | Hadiya         | 0                                                      | 1 (0.1)          | 2                                     | 0                | 2 (0.2)                                                              | 1 (0.1)         |
|                           | Kenbata        | 2 (0.2)                                                | 1 (0.1)          | 1                                     | 0                | 3 (0.3)                                                              | 1 (0.1)         |
|                           | Gamo           | 0                                                      | 0                | 1                                     | 0                | 1 (0.1)                                                              | 0               |
|                           | Unknown        | 0                                                      | 1 (0.1)          |                                       | 0                | 0                                                                    | 1 (0.1)         |
| Clinical Stage*, left leg | I              | 45 (4.8)                                               | 0                | 79 (40.7)                             | 0                | 124 (10.9)                                                           | 0               |
|                           | II             | 522 (55.3)                                             | 0                | 61 (31.5)                             | 0                | 583 (51.3)                                                           | 0               |
|                           | III            | 280 (29.7)                                             | 0                | 44 (22.7)                             | 0                | 324 (28.5)                                                           | 0               |
|                           | IV             | 62 (6.6)                                               | 0                | 2 (1)                                 | 0                | 64 (5.6)                                                             | 0               |
|                           | V              | 34 (3.6)                                               | 0                | 8 (4.1)                               | 0                | 42 (3.7)                                                             | 0               |
| Clinical Stage, right leg | I              | 51 (5.4)                                               | 0                | 81 (41.8)                             | 0                | 132 (11.6)                                                           | 0               |
|                           | II             | 515 (54.6)                                             | 0                | 57 (29.4)                             | 0                | 572 (50.3)                                                           | 0               |
|                           | III            | 284 (30.1)                                             | 0                | 49 (25.3)                             | 0                | 333 (29.3)                                                           | 0               |
|                           | IV             | 58 (6.2)                                               | 0                | 1 (0.5)                               | 0                | 59 (5.2)                                                             | 0               |
|                           | V              | 35 (3.7)                                               | 0                | 6 (3.1)                               | 0                | 41 (3.6)                                                             | 0               |

\*Clinical staging was done using the podocoinosis clinical staging system as described by Tekola et al[1]

**Supplementary Table 2: Summary of sample quality control (QC) data for datasets 1 and 3**

| Filter                                 | Dataset 1 (n=1920)*                          |                                       | Dataset 3 (n=2339)*               |                                         |
|----------------------------------------|----------------------------------------------|---------------------------------------|-----------------------------------|-----------------------------------------|
|                                        | Number of failed samples                     | Remaining samples                     | Number of failed samples          | Remaining samples                       |
| Non-founder (siblings with parent (s)) | 0                                            | 1920                                  | 0                                 | 2339                                    |
| Sample call rate (<90%)                | 14 (6 cases; 8 controls)                     | 1906                                  | 21 (8 cases, 13 controls)         | 2318                                    |
| Heterozygosity (>3 s.d. from the mean) | 0                                            | 1906                                  | 30 (14 cases, 16 controls)        | No deviate in PCA with 1000G            |
| Sex check (F>0.8 male, F<0.02 female)  | 14 (11 cases; 2 controls; 1 unknown)         | 1892                                  | 14 (6 cases, 8 controls)          | 2304                                    |
| Duplicates ( >0.09)                    | 0                                            | 1892                                  | 8 (2 cases, 6 controls)           | 2296                                    |
| PCA/MDS clustering (visual inspection) | 0                                            | 1892                                  | 5 (all controls)                  | 2291                                    |
| <b>Total</b>                           | <b>28</b> (17 cases, 10 controls, 1 unknown) | <b>1892</b> (943 cases, 949 controls) | <b>43</b> (16 cases, 27 controls) | <b>2291</b> (1147 cases, 1144 controls) |

PCA, principal components analysis; MDS, multi-dimensional scaling.

\*Dataset 1 comprised all study subjects recruited for this study from the three ethnic groups; dataset 3 also included Wolaita samples from the first podoconiosis GWAS

**Supplementary Table 3: Summary of single nucleotide polymorphism (SNP) quality control (QC) result in the primary replication dataset 1 and combined replication dataset 3**

| Filter                                                                                                  | dataset 1 (n=2330295)* |                 | dataset 3 (n=2399785)* |                 |
|---------------------------------------------------------------------------------------------------------|------------------------|-----------------|------------------------|-----------------|
|                                                                                                         | # SNPs excluded        | # SNPs retained | # SNPs excluded        | # SNPs retained |
| Duplicate position (appear after merging the Wolaita I dataset and the rest of the samples (dataset 1)) | 0                      | 2330295         | 12095                  | 2387690         |
| Fail strand Updating                                                                                    | 0                      | 2330295         | 8137                   | 2379553         |
| Non-biallelic/Copy Number Variant (CNVs)                                                                | 0                      | 2330295         | 0                      | 2379553         |
| Indels                                                                                                  | 0                      | 2330295         | 0                      | 2379553         |
| Non-autosomes                                                                                           | 55931                  | 2274364         | 55627                  | 2323926         |
| Call rate ( < 0.05)                                                                                     | 58716                  | 2215648         | 116531                 | 2207395         |
| Hardy-Weinberg Equilibrium (HWE) in controls (P < 10 <sup>-4</sup> )                                    | 4790                   | 2210858         | 5700                   | 2201695         |
| <b>Total</b>                                                                                            | 119437                 | 2210858         | 198090                 | 2201695         |

\*Dataset 1 comprised all study subjects recruited for this study from the three ethnic groups; dataset 3 also included Wolaita samples from the first podoconiosis GWAS

**Supplementary Table 4: Minor Allele Frequency (MAF) of the three datasets (see figure 1 main paper) after quality control (QC) procedure**

| Frequency                       | Dataset 1 | Dataset 2 | Dataset 3 |
|---------------------------------|-----------|-----------|-----------|
| <b>Monomorphic</b>              | 312868    | 325667    | 307397    |
| <b>&gt; 0 &amp; &lt;0.01</b>    | 250557    | 241758    | 561364    |
| <b>&gt;=0.01 &amp; &lt;0.05</b> | 320923    | 321882    | 317227    |
| <b>&gt;=0.05</b>                | 1326511   | 1321552   | 1323105   |

**Supplementary Table 5: SNPs that showed genome-wide significance with podocniosis in dataset 2 (Amhara and Oromo samples)**

| Locus | SNP        | Position (bp) | A1 | A2 | Gene     | Ensembl Consequence     | MAF    | P-value   | OR(95 % CI)        | BONF    |
|-------|------------|---------------|----|----|----------|-------------------------|--------|-----------|--------------------|---------|
| 6     | rs17205647 | 32637418      | A  | G  | HLA-DQB1 | upstream_gene_variant   | 0.371  | 6.469E-09 | 1.56 (1.35 - 1.82) | 0.01187 |
| 6     | rs6928482  | 32626249      | C  | T  | HLA-DQB1 | downstream_gene_variant | 0.4378 | 1.207E-08 | 1.54 (1.33 - 1.79) | 0.02215 |
| 6     | rs4538748  | 32657505      | C  | T  | -        | intergenic_variant      | 0.3738 | 1.478E-08 | 1.54 (1.33 - 1.80) | 0.02711 |
| 6     | rs7744001  | 32626086      | A  | G  | HLA-DQB1 | downstream_gene_variant | 0.3555 | 2.522E-08 | 1.55 (1.33 - 1.81) | 0.04627 |
| 6     | rs6906021  | 32626311      | C  | T  | HLA-DQB1 | downstream_gene_variant | 0.4429 | 2.535E-08 | 1.54 (1.32 - 1.80) | 0.04651 |

SNP, single nucleotide polymorphism; A1, minor allele; A2, major allele; MAF, minor allele frequency; OR, odds ratio; BONF, Bonferroni corrected P-value.

**Supplementary Table 6: Top SNPs that showed genome-wide significance with podoconiosis in dataset 3 (all samples)**

| Chr | SNP        | Position (bp) | A1 | A2 | Gene symbol | Ensembl consequence                    | MAF  | P-value  |
|-----|------------|---------------|----|----|-------------|----------------------------------------|------|----------|
| 6   | rs9270911  | 32572202      | T  | C  | -           | regulatory_region_variant              | 0.44 | 2.25E-12 |
| 6   | rs1063355  | 32627714      | T  | G  | HLA-DQB1    | 3_prime_UTR_variant                    | 0.49 | 5.54E-12 |
| 6   | rs1129740  | 32609105      | G  | A  | HLA-DQA1    | missense_variant                       | 0.49 | 6.54E-12 |
| 6   | rs9273349  | 32625869      | T  | C  | HLA-DQB1    | downstream_gene_variant                | 0.49 | 7.18E-12 |
| 6   | rs9273471  | 32628030      | A  | G  | HLA-DQB1    | splice_region_variant,intron_variant   | 0.38 | 1.95E-11 |
| 6   | rs1071630  | 32609126      | T  | C  | HLA-DQA1    | missense_variant                       | 0.49 | 1.98E-11 |
| 6   | rs17843604 | 32620283      | T  | C  | -           | intergenic_variant                     | 0.49 | 2.98E-11 |
| 6   | rs482205   | 32576009      | G  | T  | -           | intergenic_variant                     | 0.36 | 3.69E-11 |
| 6   | rs9271498  | 32589282      | A  | G  | -           | intergenic_variant                     | 0.3  | 3.88E-11 |
| 6   | rs9271589  | 32591128      | A  | G  | HLA-DQA1    | upstream_gene_variant                  | 0.3  | 3.88E-11 |
| 6   | rs9271776  | 32594341      | C  | T  | HLA-DQA1    | upstream_gene_variant                  | 0.3  | 3.88E-11 |
| 6   | rs1130161  | 32610994      | A  | C  | HLA-DQA1    | 3_prime_UTR_variant                    | 0.3  | 4.06E-11 |
| 6   | rs477515   | 32569691      | A  | G  | -           | intergenic_variant                     | 0.33 | 4.19E-11 |
| 6   | rs643889   | 32575918      | T  | A  | -           | intergenic_variant                     | 0.36 | 5.30E-11 |
| 6   | rs2516049  | 32570400      | C  | T  | -           | intergenic_variant                     | 0.33 | 5.61E-11 |
| 6   | rs9271488  | 32589000      | T  | G  | -           | intergenic_variant                     | 0.3  | 1.07E-10 |
| 6   | rs28366336 | 32561956      | G  | A  | HLA-DRB1    | upstream_gene_variant                  | 0.29 | 1.17E-10 |
| 6   | rs35445101 | 32546879      | G  | A  | HLA-DRB1    | missense_variant,splice_region_variant | 0.29 | 1.67E-10 |
| 6   | rs536810   | 32577497      | T  | C  | -           | regulatory_region_variant              | 0.43 | 8.08E-10 |
| 6   | rs9274689  | 32636930      | C  | T  | HLA-DQB1    | upstream_gene_variant                  | 0.43 | 9.35E-10 |
| 6   | rs34061722 | 32599337      | T  | C  | HLA-DQA1    | intron_variant                         | 0.34 | 1.58E-09 |
| 6   | rs482044   | 32576064      | C  | G  | -           | intergenic_variant                     | 0.4  | 1.68E-09 |
| 6   | rs9268831  | 32427748      | T  | C  | HLA-DRB9    | non_coding_transcript_exon_variant     | 0.46 | 2.15E-09 |
| 6   | rs3021058  | 32652359      | C  | A  | -           | intergenic_variant                     | 0.43 | 2.40E-09 |
| 6   | rs9274741  | 32637994      | C  | T  | HLA-DQB1    | upstream_gene_variant                  | 0.44 | 2.93E-09 |
| 6   | rs4642516  | 32657543      | T  | G  | -           | TF_binding_site_variant                | 0.43 | 3.02E-09 |
| 6   | rs9275136  | 32650757      | T  | C  | -           | intergenic_variant                     | 0.43 | 3.08E-09 |
| 6   | rs9275141  | 32651117      | G  | T  | -           | intergenic_variant                     | 0.43 | 3.08E-09 |

|   |            |          |   |   |          |                           |      |          |
|---|------------|----------|---|---|----------|---------------------------|------|----------|
| 6 | rs9275162  | 32652687 | C | T | -        | intergenic_variant        | 0.43 | 3.08E-09 |
| 6 | rs9275169  | 32653721 | A | T | -        | regulatory_region_variant | 0.44 | 3.21E-09 |
| 6 | rs9275133  | 32650588 | G | A | -        | intergenic_variant        | 0.43 | 3.34E-09 |
| 6 | rs2856695  | 32651894 | G | A | -        | intergenic_variant        | 0.43 | 3.50E-09 |
| 6 | rs9275154  | 32652435 | T | C | -        | intergenic_variant        | 0.43 | 3.88E-09 |
| 6 | rs2856693  | 32653283 | T | C | -        | intergenic_variant        | 0.43 | 4.35E-09 |
| 6 | rs2856667  | 32665079 | C | T | -        | intergenic_variant        | 0.43 | 4.36E-09 |
| 6 | rs17205647 | 32637418 | A | G | HLA-DQB1 | upstream_gene_variant     | 0.37 | 4.40E-09 |
| 6 | rs73732611 | 32695075 | C | T | HLA-DQB3 | downstream_gene_variant   | 0.07 | 4.67E-09 |
| 6 | rs28407322 | 32603355 | C | T | HLA-DQA1 | upstream_gene_variant     | 0.34 | 7.01E-09 |
| 6 | rs4538748  | 32657505 | C | T | -        | intergenic_variant        | 0.38 | 7.74E-09 |
| 6 | rs17427445 | 32663764 | A | G | -        | intergenic_variant        | 0.14 | 1.08E-08 |
| 6 | rs35998847 | 32666997 | A | G | -        | intergenic_variant        | 0.14 | 1.08E-08 |
| 6 | rs17427564 | 32667067 | C | T | -        | intergenic_variant        | 0.14 | 1.30E-08 |
| 6 | rs10947332 | 32677440 | A | G | MTCO3P1  | upstream_gene_variant     | 0.14 | 1.40E-08 |
| 6 | rs10484561 | 32665420 | G | T | -        | intergenic_variant        | 0.13 | 1.57E-08 |
| 6 | rs12526612 | 32653598 | A | G | -        | regulatory_region_variant | 0.14 | 1.69E-08 |
| 6 | rs7744001  | 32626086 | A | G | HLA-DQB1 | downstream_gene_variant   | 0.35 | 1.83E-08 |
| 6 | rs6689     | 32627700 | G | A | HLA-DQB1 | 3_prime_UTR_variant       | 0.31 | 2.05E-08 |
|   |            |          |   |   |          |                           |      |          |

Chr, chromosome; SNP, single nucleotide polymorphism; A1, minor allele; A2, major allele; MAF, minor allele frequency.

**Supplementary Table 7: Traits associated with HLA SNPs in LD with podoconiosis-associated SNPs**

| SNP*      | Chromosome | location (bp) | LD SNP**  | PMID     | Trait                                              | Mapped gene             | P-value |
|-----------|------------|---------------|-----------|----------|----------------------------------------------------|-------------------------|---------|
| rs6928482 | 6          | 32627714      | rs1063355 | 24837172 | Ulcerative colitis                                 | HLA-DQB1, HLA-DQB1-AS1  | 2E-6    |
| rs482205  | 6          | 32570400      | rs2516049 | 26819262 | Epstein Barr virus nuclear antigen 1 IgG levels    | HLA-DRB1 - LOC107986589 | 3E-20   |
| rs482205  | 6          | 32570400      | rs2516049 | 26819262 | Epstein Barr virus nuclear antigen 1 IgG levels    | HLA-DRB1 - LOC107986589 | 6E-14   |
| rs482205  | 6          | 32570400      | rs2516049 | 26819262 | Epstein Barr virus nuclear antigen 1 IgG levels    | HLA-DRB1 - LOC107986589 | 4E-9    |
| rs6928482 | 6          | 32603487      | rs3104367 | 27182965 | Asthma                                             | HLA-DRB1 - LOC107986589 | 1E-40   |
| rs482205  | 6          | 32569691      | rs477515  | 24282030 | Hepatitis B vaccine response                       | HLA-DRB1 - LOC107986589 | 3E-19   |
| rs482205  | 6          | 32569691      | rs477515  | 23326239 | Epstein Barr virus nuclear antigen immune response | HLA-DRB1 - LOC107986589 | 3E-13   |
| rs482205  | 6          | 32569691      | rs477515  | 18758464 | Inflammatory bowel disease                         | HLA-DRB1 - LOC107986589 | 1E-8    |
| rs6906021 | 6          | 32626311      | rs6906021 | 23817569 | Self-reported allergy                              | HLA-DQA1 - HLA-DQB1     | 7E-15   |
| rs6906021 | 6          | 32626311      | rs6906021 | 23817571 | Allergic sensitization                             | HLA-DQA1 - HLA-DQB1     | 2E-12   |
| rs6928482 | 6          | 32626130      | rs7744020 | 24204295 | Narcolepsy (age of onset)                          | HLA-DQA1 - HLA-DQB1     | 8E-9    |
| rs6928482 | 6          | 32604372      | rs9272346 | 17554300 | Type 1 diabetes                                    | HLA-DRB1 - LOC107986589 | 5E-134  |
| rs6928482 | 6          | 32604372      | rs9272346 | 18978792 | Type 1 diabetes                                    | HLA-DRB1 - LOC107986589 | 6E-129  |
| rs6928482 | 6          | 32604372      | rs9272346 | 23181788 | Asthma                                             | HLA-DRB1 - LOC107986589 | 2E-8    |
| rs6928482 | 6          | 32626601      | rs9273373 | 24388013 | Asthma and hay fever                               | HLA-DQA1 - HLA-DQB1     | 4E-14   |
| rs6928482 | 6          | 32677912      | rs9275563 | 23472185 | Multiple sclerosis (OCB status)                    | MTCO3P1 - LOC102725019  | 6E-11   |

SNP, single nucleotide polymorphism; bp, base pair; LD, linkage disequilibrium; PMID, PubMed identification; OCB, oligoclonal bands

\*SNP significantly associated with podoconiosis in the GWAS reported in this paper (see table 1, main paper).

\*\*Other HLA-located SNP in linkage disequilibrium (LD) with the SNP in column one shown to associated with the trait mentioned in column six and data published in PMID reference given in column five.



# Supplementary Figures

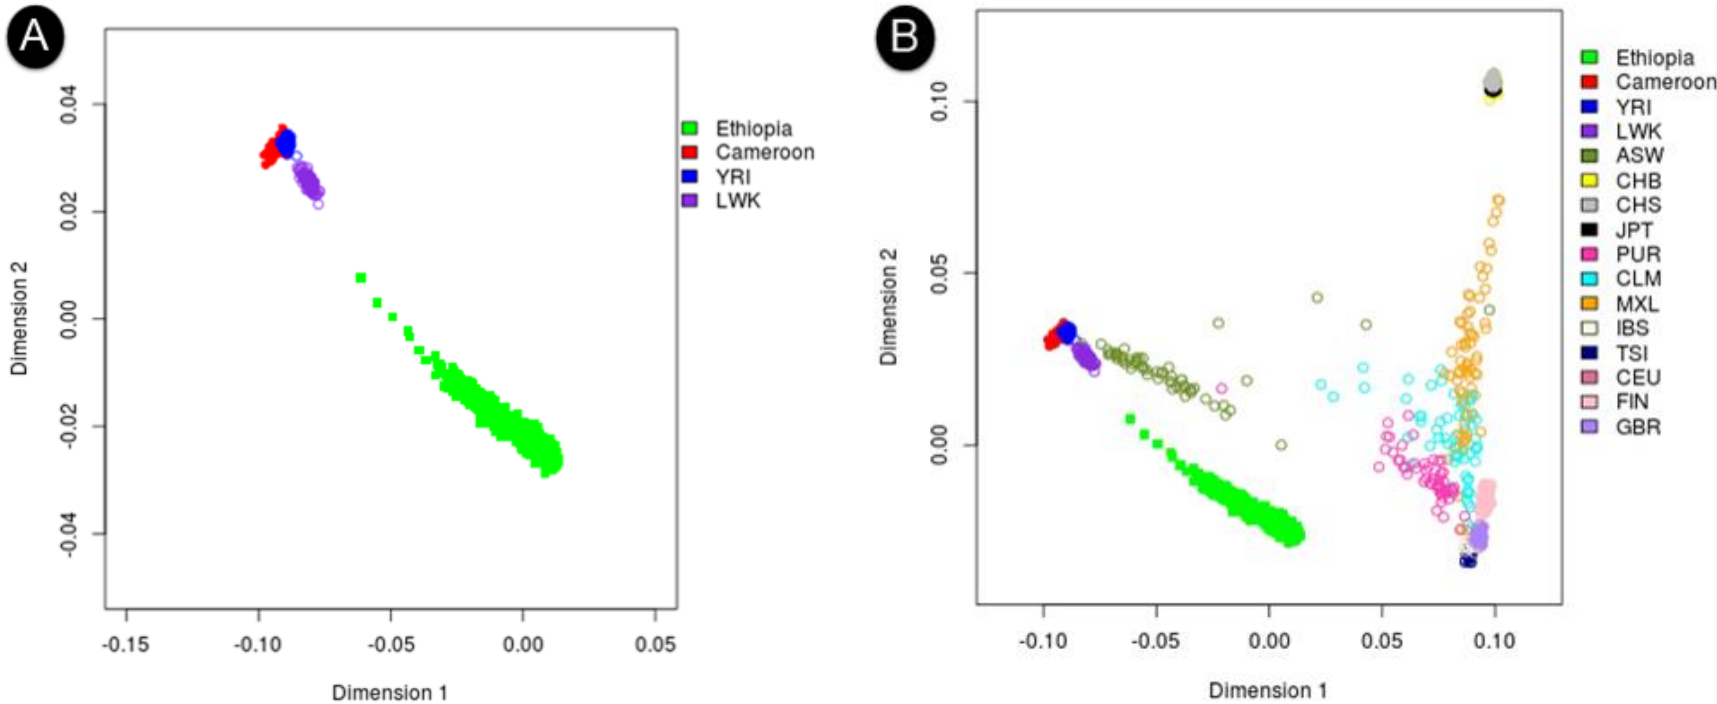

**Supplementary figure 1:** Multidimensional scaling (MDS) plot of the Ethiopian samples with (A) African (B) non-African populations included in the 1000 Genome project[2].

A

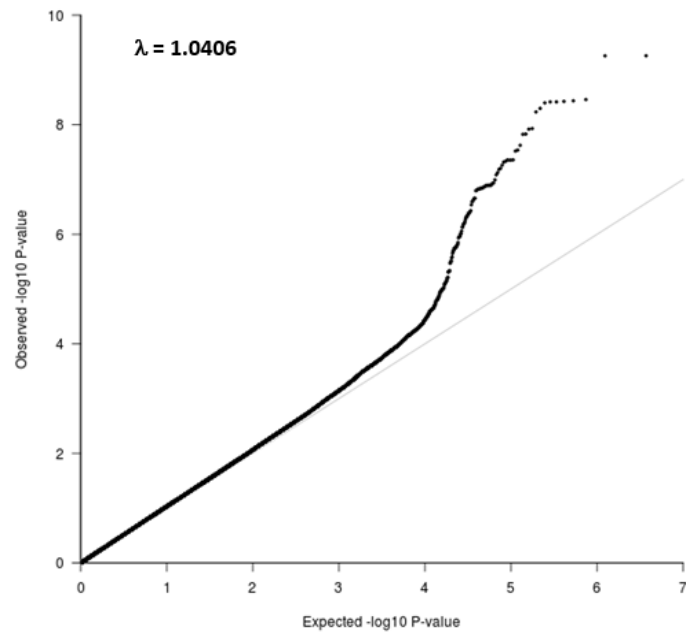

B

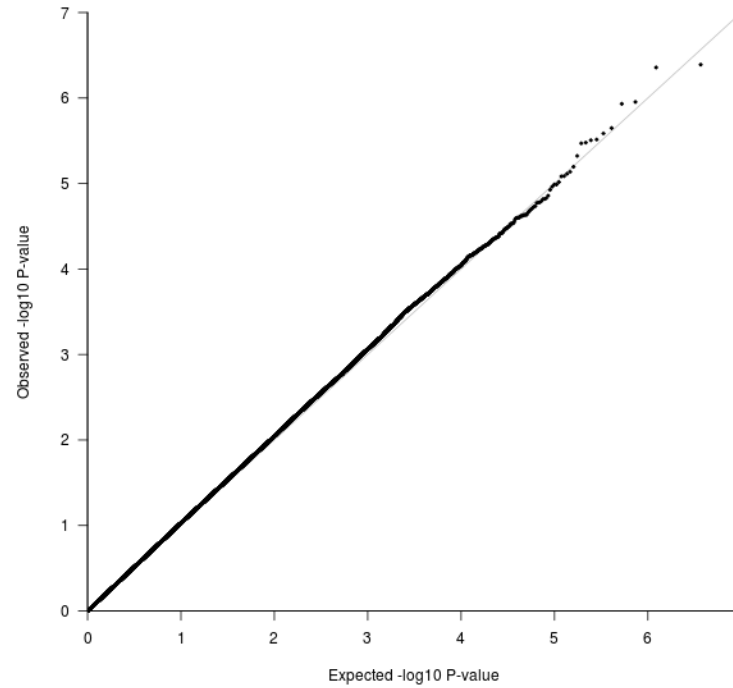

**Supplementary figure 2.** A) Quantile-Quantile (Q-Q) plot for dataset 1 which included 1892 samples collected from three different Ethiopian ethnic groups and B) after removal of SNPs from the HLA region (base pairs 29,000-33,000 on chromosome 6).

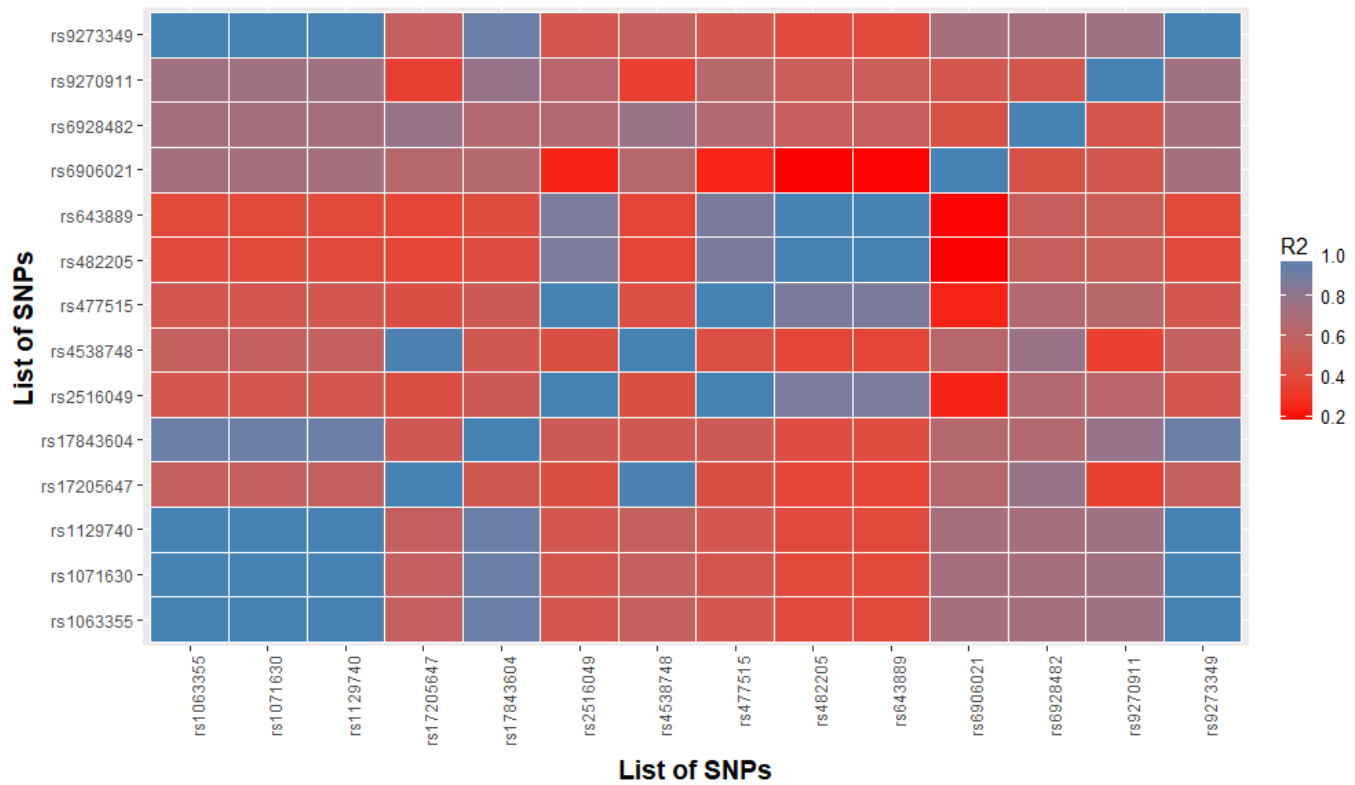

**Supplementary figure 3:** Heat map showing LD between the 14 associated ( $p < 5e-8$ ) HLA class II SNPs on chromosome 6 from the GWAS of 1892 individuals from the three ethnic groups combined (Dataset 1).

## References

1. Tekola, F., et al., *Development and testing of a de novo clinical staging system for podoconiosis (endemic non-filarial elephantiasis)*. Trop. Med. Int. Health, 2008. **13**: p. 1277-83.
2. 1000 Genomes Project Consortium, et al., *A global reference for human genetic variation*. Nature, 2015. **526**(7571): p. 68-74.
